# Supplementary material
Source: PubMed Central journal article supplement (PMC6322455)
Supplement: e14a9f94aa42e8d2222a973df81e58a1_JCM.01096-18-s0001.pdf [file e14a9f94aa42e8d2222a973df81e58a1_JCM.01096-18-s0001.pdf]

## Supplemental material

Table S1 Results of 16 non-mycobacteria tested with MeltPro Myco Assay

| NO. | Bacteria <sup>a</sup>            | Results obtained by the MeltPro Myco assay |        |        |        |                  |
|-----|----------------------------------|--------------------------------------------|--------|--------|--------|------------------|
|     |                                  | FAM/°C                                     | HEX/°C | ROX/°C | Cy5/°C | Identification   |
| N1  | <i>Nocardia brasiliensis</i>     | -                                          | -      | 79.1   | -      | non-mycobacteria |
| N2  | <i>Corynebacterium pekinense</i> | -                                          | -      | 79.0   | -      | non-mycobacteria |
| N3  | <i>Streptococcus pneumoniae</i>  | -                                          | -      | 79.2   | -      | non-mycobacteria |
| N4  | <i>Legionella pneumophila</i>    | -                                          | -      | 79.2   | -      | non-mycobacteria |
| N5  | <i>Bordetella pertussis</i>      | -                                          | -      | 79.0   | -      | non-mycobacteria |
| N6  | <i>Klebsiella pneumoniae</i>     | -                                          | -      | 78.9   | -      | non-mycobacteria |
| N7  | <i>Escherichia coli</i>          | -                                          | -      | 79.1   | -      | non-mycobacteria |
| N8  | <i>Pseudomonas aeruginosa</i>    | -                                          | -      | 79.0   | -      | non-mycobacteria |
| N9  | <i>Acinetobacter baumannii</i>   | -                                          | -      | 79.2   | -      | non-mycobacteria |
| N10 | <i>Staphylococcus aureus</i>     | -                                          | -      | 78.9   | -      | non-mycobacteria |
| N11 | <i>Enterobacter cloacae</i>      | -                                          | -      | 79.0   | -      | non-mycobacteria |
| N12 | <i>Proteus vulgaris</i>          | -                                          | -      | 79.2   | -      | non-mycobacteria |
| N13 | <i>Citrobacter freundii</i>      | -                                          | -      | 79.0   | -      | non-mycobacteria |
| N14 | <i>Haemophilus influenzae</i>    | -                                          | -      | 79.1   | -      | non-mycobacteria |
| N15 | <i>Adenovirus</i>                | -                                          | -      | 79.0   | -      | non-mycobacteria |
| N16 | <i>Mycoplasma pneumoniae</i>     | -                                          | -      | 78.8   | -      | non-mycobacteria |

<sup>a</sup> These strains were provided in the form of genomic DNA of approximately 10<sup>3</sup> copies/μL.
